# Supplementary material for: Optimizing the Rheological and Thermomechanical Response of Acrylonitrile Butadiene Styrene/Silicon Nitride Nanocomposites in Material Extrusion Additive Manufacturing
Source: MDPI journal article supplement (doi:10.3390/nano13101588), 2023-05-09
Supplement: s1 [file s1]

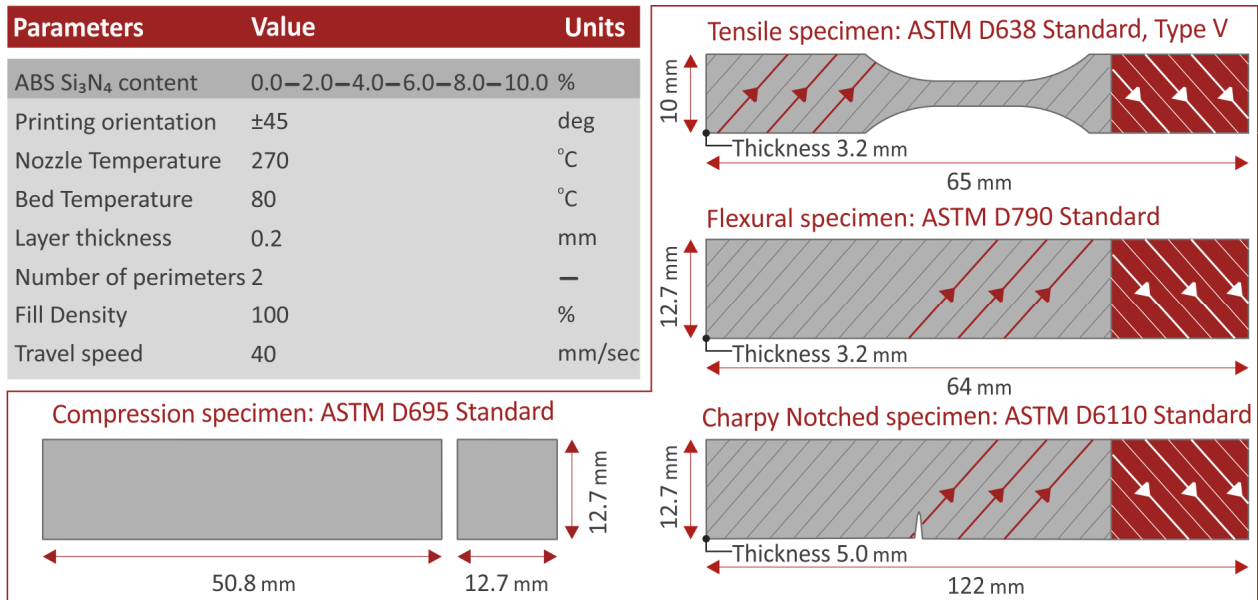

**Figure S1.** 3D printing settings and mechanical test samples geometry, following the corresponding international standard of testing.
